# Supplementary material for: Electronic, phononic, and superconducting properties of FeH x ( x = 1–6) at 150 GPa
Source: Royal Society of Chemistry journal article supplement (doi:10.1039/d4tc04106b), 2024-11-05
Supplement: d4tc04106b1.pdf [file d4tc04106b1.pdf]

## Supporting Material

### Electronic, phononic, and superconducting properties of $\text{FeH}_x$ ( $x=1-6$ ) at 150 GPa

Hao Quan<sup>1,2,3\*</sup>, Shi-Na Li<sup>1†</sup>, Yu-Lin Han<sup>4‡</sup>, Jian-Guo Si<sup>5</sup>, Wen-Xue Zhang<sup>6</sup>, Wei-Dong Li<sup>7</sup>, Bao-Tian Wang<sup>2,3§</sup>,

<sup>1</sup>*Institute of Theoretical Physics, State Key Laboratory of Quantum Optics and Quantum Optics Devices, Collaborative Innovation Center of Extreme Optics, Shanxi University, Taiyuan, 030006, PR China*

<sup>2</sup>*Institute of High Energy Physics, Chinese Academy of Science, Beijing 100049, PR China*

<sup>3</sup>*Spallation Neutron Source Science Center, Dongguan 523803, PR China*

<sup>4</sup>*School of Physics and Physical Engineering, Qufu Normal University, Qufu, 273165, PR China*

<sup>5</sup>*Songshan Lake Materials Laboratory, Dongguan, Guangdong 523808, PR China*

<sup>6</sup>*Institute of Laser Spectroscopy, State Key Laboratory of Quantum Optics and Quantum Optics Devices, Collaborative Innovation Center of Extreme Optics, Shanxi University, Taiyuan 030006, PR China*

<sup>7</sup>*Shenzhen Key Laboratory of Ultra Intense Laser and Advanced Material Technology, Center for Intense Laser Application Technology, and College of Engineering Physics, Shenzhen Technology University, Shenzhen 518118, PR China;*

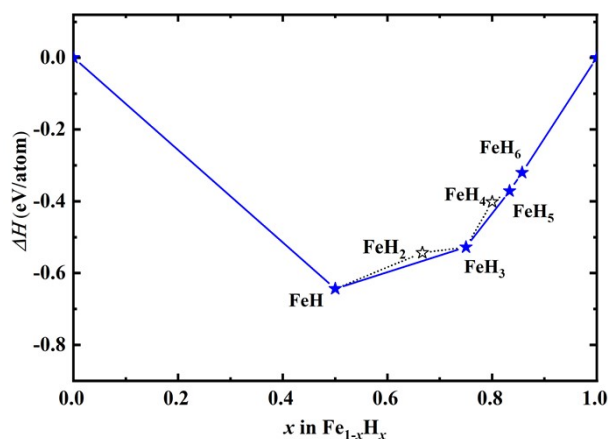

**Fig. S1 Convex hull diagram with ZPE of  $\text{FeH}_x$  ( $x=1-6$ ) at 150 GPa**

Comparing Fig. S1 with Fig. 1 in the main manuscript, we find that the differences raised by including ZPE is limited. The only observable difference is the enthalpy difference ( $\Delta H$ ) of  $\text{FeH}_2$ , which makes  $\text{FeH}_2$  locate above the convex hull by 24 meV.

\* These authors contributed equally to this work

† Corresponding author [snli@sxu.edu.cn](mailto:snli@sxu.edu.cn)

‡ Corresponding author [1624609643@qq.com](mailto:1624609643@qq.com)

§ Corresponding author [wangbt@ihep.ac.cn](mailto:wangbt@ihep.ac.cn)

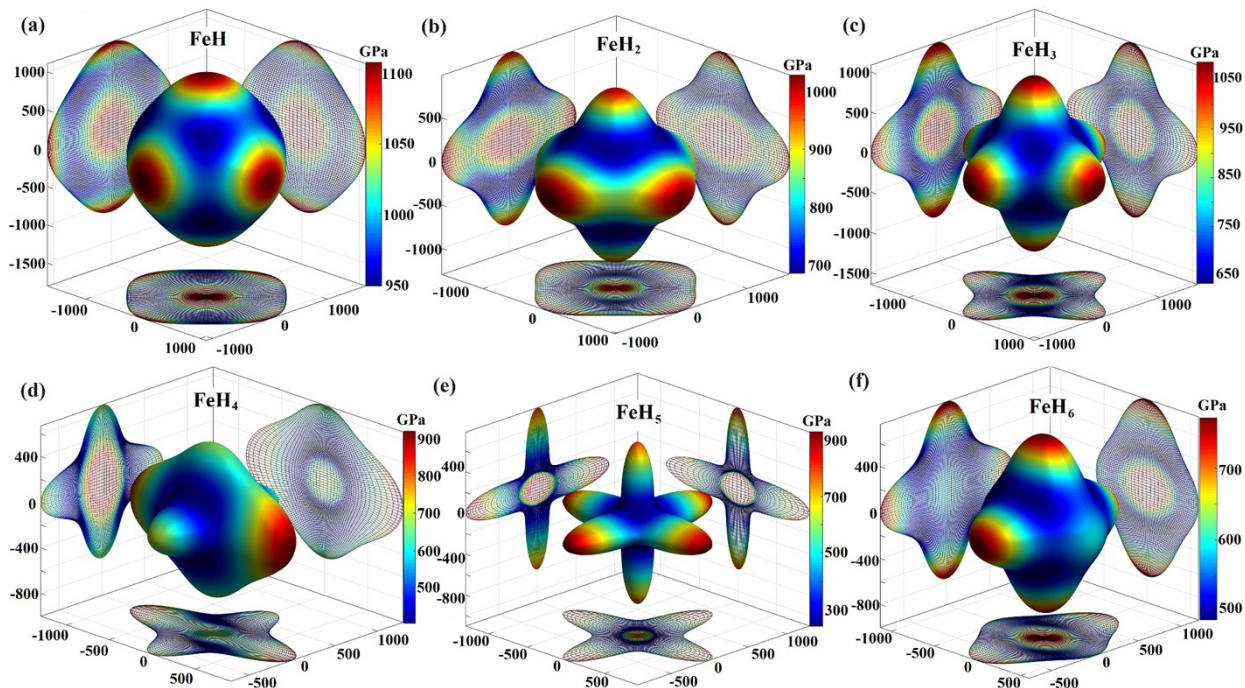

Fig. S2 3D directional dependent of Young's modulus for FeH<sub>x</sub> (x=1-6) at 150 GPa.

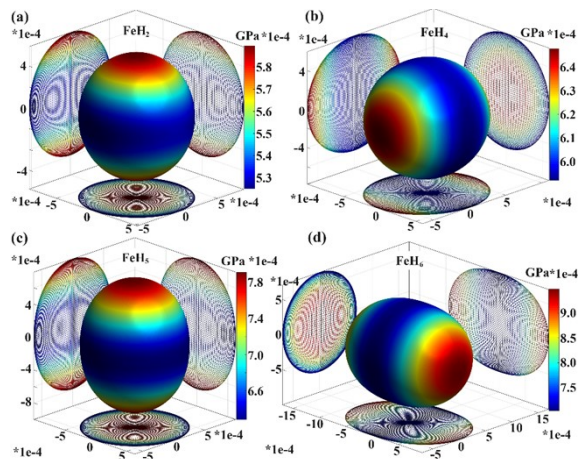

Fig. S3 3D directional dependent of linear compressibility  $\beta$  for (a) FeH<sub>2</sub>, (b) FeH<sub>4</sub>, (c) FeH<sub>5</sub>, and (d) FeH<sub>6</sub> at 150 GPa.

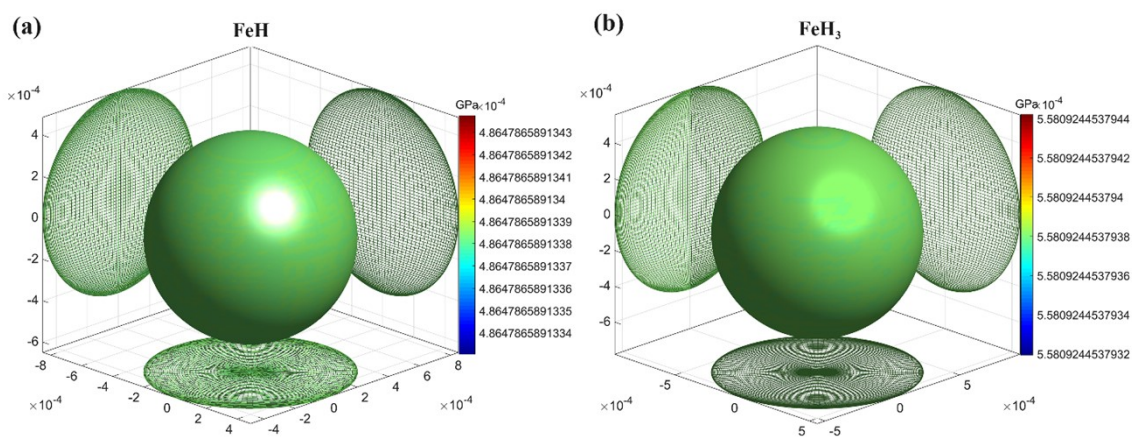

Fig. S4 Linear compressibility  $\beta$  of 3D graph for (a) FeH and (b) FeH<sub>3</sub> at 150 GPa.

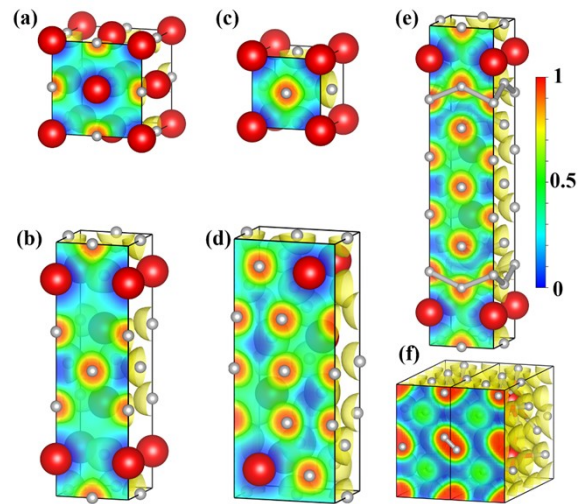

Fig. S5 Electron localization functions (ELF) of (a) FeH, (b) FeH<sub>2</sub>, (c) FeH<sub>3</sub>, (d) FeH<sub>4</sub>, (e) FeH<sub>5</sub>, and (f) FeH<sub>6</sub> (1×2×1 cell) at 150 GPa. Isosurface values are all set to 0.5.

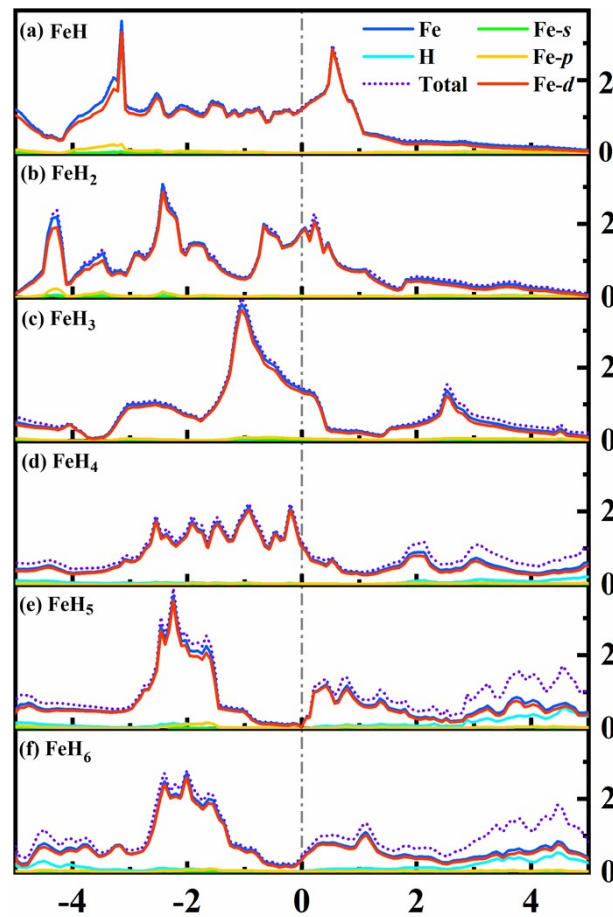

Fig. S6 (a) Density of states (DOS) of FeH<sub>x</sub> (x=1-6) at 150 GPa.

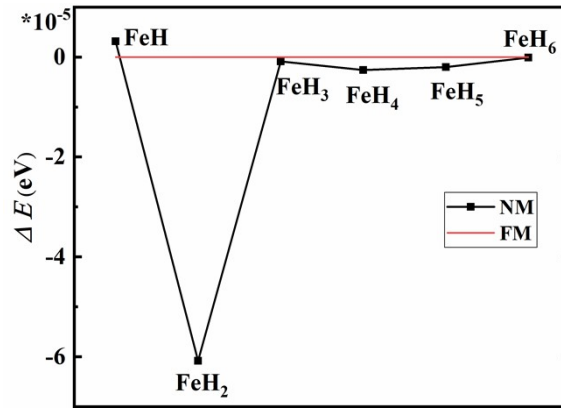

Fig. S7 Energy differences between different magnetic states of  $\text{FeH}_x$  ( $x=1-6$ ) at 150 GPa.

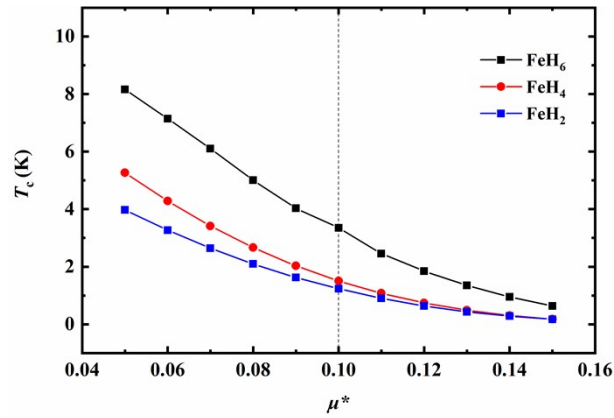

Fig. S8 Evaluated  $T_c$  of  $\text{FeH}_2$ ,  $\text{FeH}_4$ , and  $\text{FeH}_6$  as a function of Coulomb pseudopotential  $\mu^*$ . Vertical line marks the value  $\mu^* = 0.10$  used in this work.

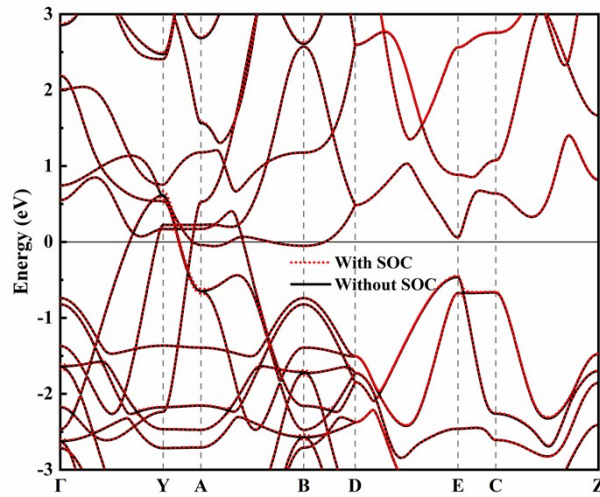

Fig. S9 Band structure of  $\text{FeH}_6$  with and without SOC.

Table S1 Crystal structure details of FeH<sub>x</sub> (x=1-6) at 150 GPa.

|                            | Lattice parameters<br>(Å, °) | Atom position |                       | Distances |
|----------------------------|------------------------------|---------------|-----------------------|-----------|
|                            |                              |               |                       | Fe-H (Å)  |
| FeH                        | $a=b=c=3.31$                 | Fe(4a)        | (0.0,0.0,0.0)         |           |
| <i>Fm</i> $\bar{3}m$ , Z=4 | $\alpha=\beta=\gamma=90$     | H(4b)         | (0.5,0.5,0.5)         | 2.343     |
| FeH <sub>2</sub>           | $a=b=2.34, c=7.95$           | Fe(4e)        | (0.0,0.0,-0.146)      |           |
| <i>I4/mmm</i> , Z=4        | $\alpha=\beta=\gamma=90$     | H(4e)         | (0.0,0.0,0.353)       | 1.658     |
|                            |                              | H(4e)         | (0.0,0.5,0.0)         | 1.648     |
| FeH <sub>3</sub>           | $a=b=c=2.33$                 | Fe(1a)        | (0.0,0.0,0.0)         |           |
| <i>Pm</i> $\bar{3}m$ , Z=1 | $\alpha=\beta=\gamma=90$     | H(3c)         | (0.5,0.5,0.0)         | 1.649     |
| FeH <sub>4</sub>           | $a=2.35, b=3.15, c=7.81$     | Fe(4e)        | (0.0,0.25,0.115)      |           |
| <i>Imma</i> , Z=4          | $\alpha=\beta=\gamma=90$     | H(4b)         | (0.5,0.0,0.0)         | 1.676     |
|                            |                              | H(8h)         | (0.0,0.974,0.300)     | 1.604     |
|                            |                              | H(4e)         | (0.0,0.75,0.101)      | 1.579     |
| FeH <sub>5</sub>           | $a=b=2.39, c=11.51$          | Fe(4e)        | (0.0,0.0,0.897)       |           |
| <i>I4/mmm</i> , Z =4       | $\alpha=\beta=\gamma=90$     | H(8g)         | (0.0,0.5,0.185)       | 1.523     |
|                            |                              | H(4e)         | (0.0,0.0,0.410)       | 1.695     |
|                            |                              | H(4c)         | (0.0,0.5,0.0)         | 1.680     |
|                            |                              | H(4e)         | (0.0,0.0,0.230)       | 1.468     |
| FeH <sub>6</sub>           | $a=6.47, b=2.38, c=4.77$     | Fe(4g)        | (0.317,0.498,0.25)    |           |
| <i>P2/c</i> , Z =4         | $\alpha=\beta=\gamma=90$     | H(4g)         | (0.665,0.0,0.499)     | 1.686     |
|                            |                              | H(4g)         | (-0.0004,0.887,0.948) | 2.436     |
|                            |                              | H(4g)         | (0.911,0.537,0.250)   | 1.476     |
|                            |                              | H(4g)         | (0.169,-0.0003,0.251) | 1.530     |
|                            |                              | H(4g)         | (0.161,0.5003,0.0001) | 1.526     |
|                            |                              | H(2b)         | (0.5,0.5,0.0)         | 1.675     |
|                            |                              | H(2f)         | (0.5,-0.0002,0.75)    | 1.681     |

**Table S2 Minimum and maximum value of Young's modulus  $E$  and linear compressibility  $\beta$  for  $\text{FeH}_x$  ( $x=1-6$ ) at 150 GPa.**

|                  | $E_{min}$ | $E_{max}$ | $E_{min}/E_{max}$ | $\beta_{min}$ | $\beta_{max}$ | $\beta_{min}/\beta_{max}$ |
|------------------|-----------|-----------|-------------------|---------------|---------------|---------------------------|
| FeH              | 948.57    | 1108.31   | 0.86              | 0.48          | 0.48          | 1.00                      |
| FeH <sub>2</sub> | 687.51    | 1027.01   | 0.67              | 0.52          | 0.58          | 0.90                      |
| FeH <sub>3</sub> | 633.75    | 1087.04   | 0.58              | 0.55          | 0.55          | 1.0                       |
| FeH <sub>4</sub> | 407.34    | 917.49    | 0.44              | 0.59          | 0.64          | 0.91                      |
| FeH <sub>5</sub> | 239.98    | 929.96    | 0.26              | 0.63          | 0.76          | 0.84                      |
| FeH <sub>6</sub> | 488.85    | 769.80    | 0.64              | 0.70          | 0.95          | 0.73                      |

## Cubic

$C_{11}$ ,  $C_{12}$  and  $C_{44}$ .

Bron-Huang mechanical stability criterion:

$$C_{11} - C_{12} > 0, C_{44} > 0, C_{11} + 2C_{12} > 0 \quad (1)$$

## Tetragonal

$C_{11}$ ,  $C_{12}$ ,  $C_{13}$ ,  $C_{33}$ ,  $C_{44}$  and  $C_{66}$ .

Bron-Huang mechanical stability criterion:

$$C_{11} - C_{12} > 0, C_{11} + C_{33} - 2C_{13} > 0, C_{11} > 0, C_{33} > 0, C_{44} > 0, C_{66} > 0 \quad (2)$$

## Orthorhombic

$C_{ii}(i=1-6)$ ,  $C_{12}$ ,  $C_{13}$ ,  $C_{23}$ ;

Bron-Huang mechanical stability criterion:

$$C_{ii} > 0 \quad (i=1,2,3,4,5,6), \quad (C_{11} + C_{22} - 2C_{12}) > 0, \quad (C_{11} + C_{33} - 2C_{13}) > 0 \\ (C_{22} + C_{33} - 2C_{23}) > 0, \quad [C_{11} + C_{22} + C_{33} + 2(C_{12} + C_{13} + C_{23})] > 0 \quad (3)$$

## Monoclinic

$C_{ii}(i=1-6)$ ,  $C_{i5}(i=1-3)$ ,  $C_{12}$ ,  $C_{13}$ ,  $C_{23}$  and  $C_{46}$ .

Bron-Huang mechanical stability criterion:

$$C_{11} > 0, C_{44} > 0, C_{11}C_{22} > C_{12}^2, C_{44}C_{66} > C_{46}^2 \\ C_{15}^2(C_{23}^2 - C_{22}C_{33}) + C_{25}^2(C_{13}^2 - C_{11}C_{33}) + C_{35}^2(C_{12}^2 - C_{11}C_{22}) \\ + 2C_{15}C_{35}(C_{13}C_{22} - C_{12}C_{23}) + 2C_{15}C_{25}(C_{12}C_{33} - C_{13}C_{23}) + 2C_{25}C_{35}(C_{23}C_{11} - C_{12}C_{13}) \\ + \Delta C_{55} > 0 \quad (4)$$

$$\Delta = C_{11}C_{22}C_{33} + 2C_{12}C_{13}C_{23} - C_{11}C_{23}^2 - C_{22}C_{13}^2 - C_{33}C_{12}^2 > 0$$

**$E$  and  $\beta$  depending on the crystal orientation:**

**Cubic** phase (for FeH and FeH<sub>3</sub>):

$$\frac{1}{E} = s_{11} - 2(s_{11} - s_{12} - \frac{1}{2}s_{44})(l_1^2l_2^2 + l_2^2l_3^2 + l_3^2l_1^2) \quad \beta = (s_{11} + 2s_{12}) \quad (5)$$

**Tetragonal** phase (for FeH<sub>2</sub> and FeH<sub>5</sub>):

$$\frac{1}{E} = (l_1^4 + l_2^4)s_{11} + l_3^4s_{33} + l_1^2l_2^2(2s_{12} + s_{66}) + l_3^2(1 - l_3^2)(2s_{13} + s_{44}) \\ \beta = (s_{11} + s_{12} + s_{13}) - (s_{11} + s_{12} - s_{13} - s_{33})l_3^2 \quad (6)$$

## Orthorhombic phase (for FeH<sub>4</sub>)

$$\frac{1}{E} = l_1^4 s_{11} + 2l_1^2 l_2^2 s_{12} + 2l_1^2 l_3^2 s_{13} + l_2^4 s_{22} + 2l_2^2 l_3^2 s_{23} + l_3^4 s_{33} + l_2^2 l_3^2 s_{44} + l_1^2 l_3^2 s_{55} + l_1^2 l_2^2 s_{66}$$

$$\beta = (s_{11} + s_{12} + s_{13})l_1^2 + (s_{12} + s_{22} + s_{23})l_2^2 + (s_{13} + s_{23} + s_{33})l_3^2 \quad (7)$$

## Monoclinic phase (for FeH<sub>6</sub>)

$$\begin{aligned} \frac{1}{E} = & l_1^4 s_{11} + 2l_1^2 l_2^2 s_{12} + 2l_1^2 l_3^2 s_{13} + 2l_1^2 l_2 l_3 s_{14} + 2l_1^3 l_3 s_{15} + 2l_1^3 l_2 s_{16} + \\ & l_2^4 s_{22} + 2l_2^2 l_3^2 s_{23} + 2l_2^3 l_3 s_{24} + 2l_1 l_2^2 l_3 s_{25} + 2l_1 l_2^3 s_{26} + l_3^4 s_{33} + 2l_2 l_3^3 s_{34} + 2l_1 l_3^3 s_{35} + 2l_1 l_2 l_3^2 s_{36} + \\ & l_2^2 l_3^2 s_{44} + 2l_1 l_2 l_3^2 s_{45} + 2l_1 l_2^2 l_3 s_{46} + l_1^2 l_3^2 s_{55} + 2l_1^2 l_2 l_3 s_{56} + l_1^2 l_2^2 s_{66} \end{aligned}$$

$$\beta = (s_{11} + s_{12} + s_{13})l_1^2 + (s_{12} + s_{22} + s_{23})l_2^2 + (s_{13} + s_{23} + s_{33})l_3^2 + (s_{15} + s_{25} + s_{35})l_3 l_1 \quad (8)$$

$s_{ij}$  is the elastic compliance matrix and  $l_1$ ,  $l_2$ , and  $l_3$  are the direction cosines in any arbitrary direction.



## High symmetry points coordinate:

### *Fm $\bar{3}m$ /Pm $\bar{3}m$*

|              |              |              |          |
|--------------|--------------|--------------|----------|
| 0.0000000000 | 0.0000000000 | 0.0000000000 | $\Gamma$ |
| 0.5000000000 | 0.0000000000 | 0.5000000000 | X        |
| 0.5000000000 | 0.5000000000 | 0.0000000000 | M        |
| 0.0000000000 | 0.0000000000 | 0.0000000000 | $\Gamma$ |
| 0.5000000000 | 0.5000000000 | 0.5000000000 | R        |
| 0.0000000000 | 0.5000000000 | 0.0000000000 | Z        |

### *I4/mmm*

|              |              |              |          |
|--------------|--------------|--------------|----------|
| 0.0000000000 | 0.0000000000 | 0.0000000000 | $\Gamma$ |
| 0.0000000000 | 0.5000000000 | 0.0000000000 | X        |
| 0.5000000000 | 0.5000000000 | 0.0000000000 | M        |
| 0.0000000000 | 0.0000000000 | 0.0000000000 | $\Gamma$ |
| 0.0000000000 | 0.0000000000 | 0.5000000000 | Z        |
| 0.0000000000 | 0.5000000000 | 0.5000000000 | R        |
| 0.5000000000 | 0.5000000000 | 0.5000000000 | A        |
| 0.0000000000 | 0.0000000000 | 0.5000000000 | Z        |
| 0.0000000000 | 0.5000000000 | 0.0000000000 | X        |
| 0.0000000000 | 0.5000000000 | 0.5000000000 | R        |
| 0.5000000000 | 0.5000000000 | 0.0000000000 | M        |
| 0.5000000000 | 0.5000000000 | 0.5000000000 | A        |

### *Imma*

|              |              |              |          |
|--------------|--------------|--------------|----------|
| 0.0000000000 | 0.0000000000 | 0.0000000000 | $\Gamma$ |
| 0.0000000000 | 0.0000000000 | 0.5000000000 | Z        |
| 0.0000000000 | 0.5000000000 | 0.5000000000 | T        |
| 0.0000000000 | 0.5000000000 | 0.0000000000 | Y        |
| 0.5000000000 | 0.5000000000 | 0.0000000000 | S        |
| 0.5000000000 | 0.0000000000 | 0.0000000000 | X        |
| 0.5000000000 | 0.0000000000 | 0.5000000000 | U        |
| 0.5000000000 | 0.5000000000 | 0.5000000000 | R        |

### *P2/c*

|               |              |              |          |
|---------------|--------------|--------------|----------|
| 0.0000000000  | 0.0000000000 | 0.0000000000 | $\Gamma$ |
| 0.0000000000  | 0.5000000000 | 0.0000000000 | Y        |
| -0.5000000000 | 0.5000000000 | 0.0000000000 | A        |
| -0.5000000000 | 0.0000000000 | 0.0000000000 | B        |
| -0.5000000000 | 0.0000000000 | 0.5000000000 | D        |
| -0.5000000000 | 0.5000000000 | 0.5000000000 | E        |
| 0.0000000000  | 0.5000000000 | 0.5000000000 | C        |
| 0.0000000000  | 0.0000000000 | 0.5000000000 | Z        |
